# Supplementary material
Source: PubMed Central journal article supplement (PMC2684477)

Supplemental Figure 3

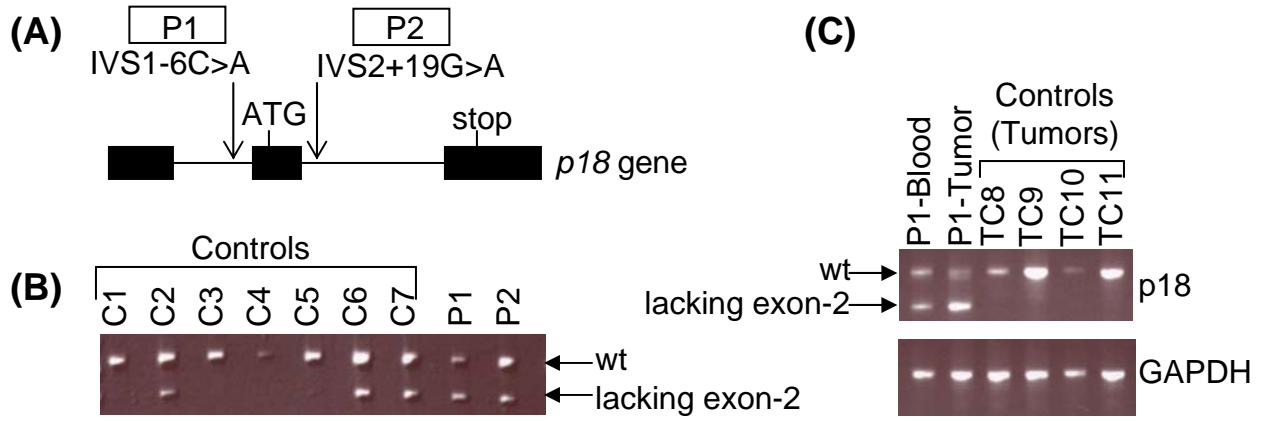

Supplement: jc.2008-2083_3.pdf [file jc.2008-2083_3.pdf]

Supplemental Figure 4

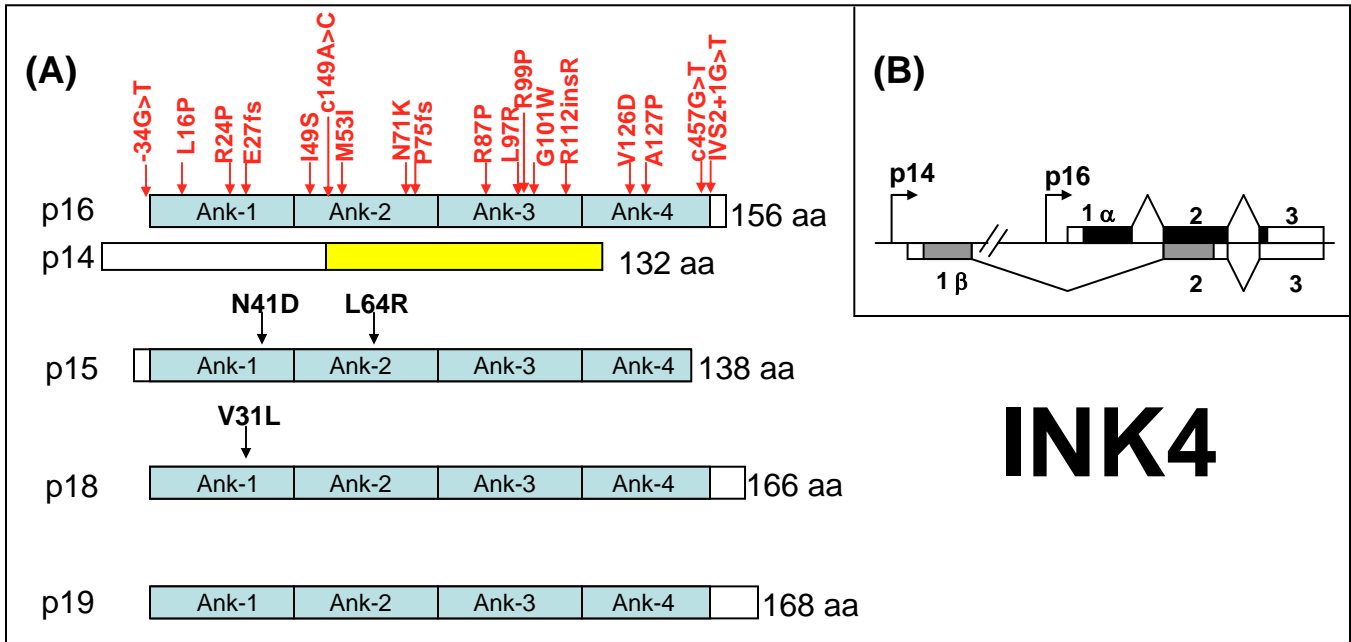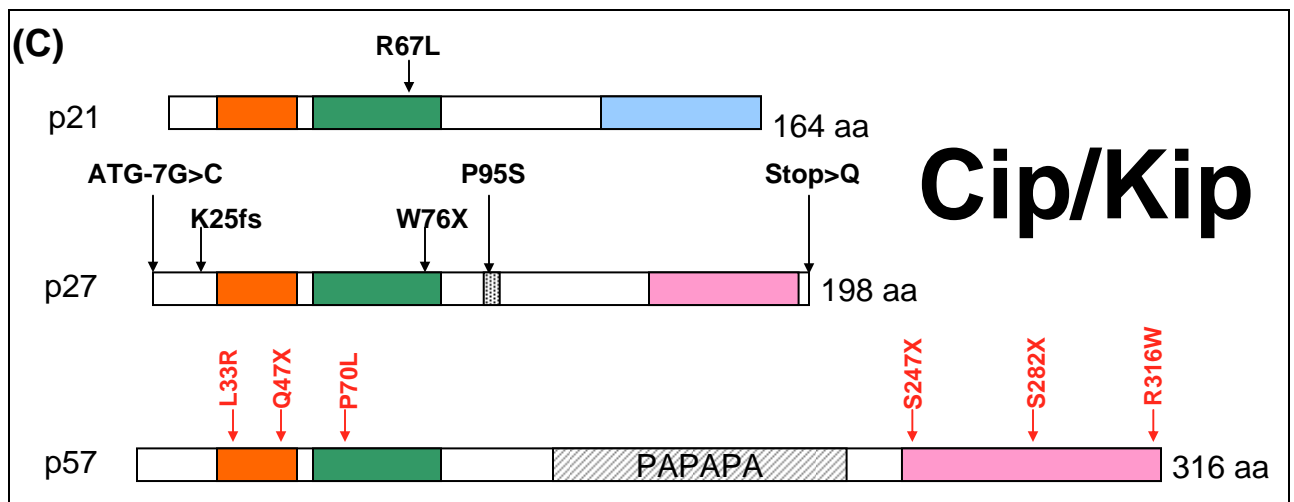

Supplement: jc.2008-2083_4.pdf [file jc.2008-2083_4.pdf]
